# Supplementary material for: Causes of Raptor Admission to the Wildlife Rehabilitation Centre in Abruzzo (Central Italy) from 2005–2016
Source: MDPI journal article supplement (doi:10.3390/ani12151916), 2022-07-27
Supplement: s1 [file s1]

Figure S1: PRISMA flowchart literature review on the topic: Causes of admission to a raptor/birds of prey rehabilitation/rescue center, including the list of 46 publication finally selected during the literature search process. (Updated June 2022)

### ***Search strategy***

Searches in electronic databases and PDFs (proceedings, textbooks, etc.) were performed based on a combination of keywords for the target condition.

*Published literature*- The following electronic databases were consulted: MEDLINE (Pubmed), Google scholar, ScienceDirect.

*Grey literature*- To explore the grey literature (i.e., non-published material) conference proceedings, grey databases and textbooks were searched.

- The conference proceedings of the following conferences were searched: ExoticsCon conference, International Conference on Avian, Herpetological and Exotic Mammal Medicine (ICARE) (from 2013 to 2019).

- The following grey databases were searched: Open Grey, and VIN (Veterinary Information Network).

### ***Search procedures***

*Electronic searches (databases)*: The searches on databases were planned to maximize sensitivity. The Boolean operator 'AND' was used between the key concepts, and English language only was selected.

(Admission causes) AND ((raptor) OR (birds of prey))

Refined search adding (long-term study) and (more than on species of bird).

### ***Inclusion criteria***

*Study designs*-Retrospective study, aiming to analyze the admission causes of wild population of raptors/birds of prey.

*Participants*- Bird of preys – raptors – one species - more species – nocturnal and diurnal raptors. All species, subspecies, age, and sex were eligible for inclusion.

*First target study*- The target study was found long-term study conducted in Italy analyzing the admission causes in wild rehabilitation center for raptors/birds of prey.

*Second Target study*: selected the literature conserving wildlife rehabilitation center analyzing raptors and the causes of admission.

### **Results**

The search of databases provided a total of 36828 citations after the improved terminology used to search.

The key words were adjusted to obtain results more specific. However, article related to the releasing and post releasing monitoring were considered.

- Pubmed: 23 results obtained – improved research 5 - 5 eligible.
- Science Direct: 93 – improved research 3 – only 3 articles and 1 book – 4 eligible.
- Google scholar: 36700 – 38 eligible.

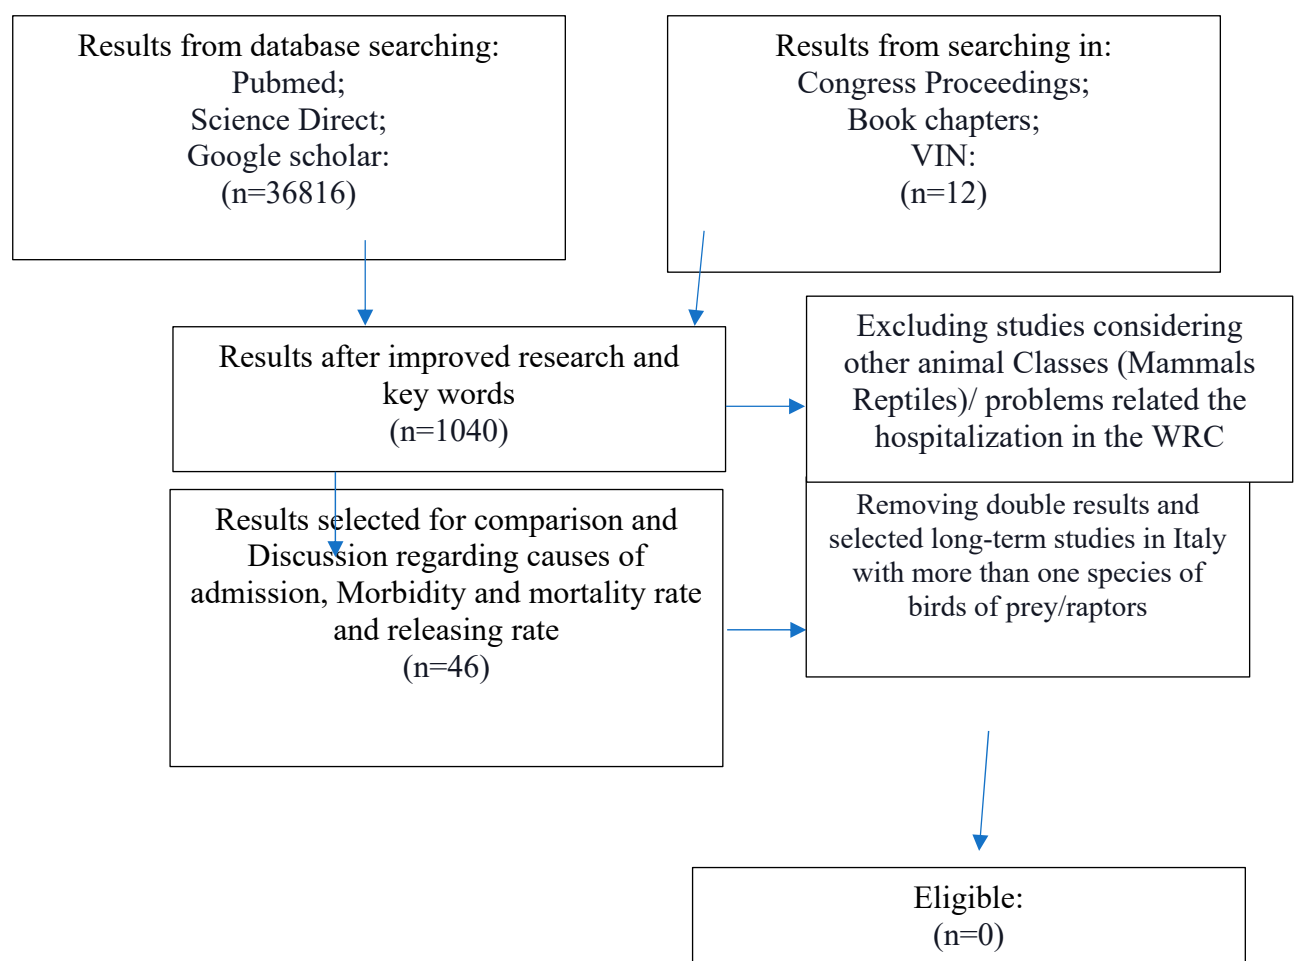

Please note that, the result of this literature research was updating several times until June 2022

1. Kovács, A.; Mammen, U.C.C.; Wernham, C.V. European monitoring for raptors and owls: State of the art and future needs. *Ambio* **2008**, *37*, 408–412; DOI:10.1579/0044-7447(2008)37[408:emfrao]2.0.co;2.
2. Burfield, I.J. The conservation status and trends of raptors and owls in Europe. *Ambio* **2008**, *37*, 401–407; DOI:10.1579/0044-7447(2008)37[401:tcsato]2.0.co;2.
3. Newton, I.; Wyllie, I.; Dale, L. Trends in the numbers and mortality patterns of sparrowhawks (*Accipiter nisus*) and kestrels (*Falco tinnunculus*) in Britain, as revealed by carcass analyses. *J. Zool.* **1999**, *248*, 139–147; DOI:10.1111/j.1469-7998.1999.tb01190.x.
4. Rodríguez, B.; Rodríguez, A.; Siverio, F.; Siverio, M. Causes of raptor admissions to a wildlife rehabilitation center in Tenerife (Canary Islands). *J. Raptor Res.* **2010**, *44*, 30–39; DOI:10.3356/jrr-09-40.1.
5. Work, T.M.; Hale, J. Causes of owl mortality in Hawaii, 1992 to 1994. *J. Wildl. Dis.* **1996**, *32*, 266–273; DOI:10.7589/0090-3558-32.2.266.
6. Morishita, T.Y.; Fullerton, A.T.; Lowenstine, L.J.; Gardner, I.A.; Brooks, D.L. Morbidity and mortality in free-living raptorial birds of Northern California: A retrospective study, 1983–1994. *J. Avian Med. Surg.* **1998**, *12*, 78–81.
7. Wendell, M.D.; Sleeman, J.M.; Kratz, G. Retrospective study of morbidity and mortality of raptors admitted to Colorado state university veterinary teaching hospital during 1995 to 1998. *J. Wildl. Dis.* **2002**, *38*, 101–106; DOI:10.7589/0090-3558-38.1.101.
8. Martínez, J.A.; Martínez, J.E.; Mañosa, S.; Zuberogitia, I.; Calvo, J.F. How to manage human-induced mortality in the eagle owl *Bubo bubo*. *Bird Conserv. Int.* **2006**, *16*, 265–278; DOI:10.1017/s0959270906000402.
9. Kelly, A.; Bland, M. Admissions, diagnoses, and outcomes for Eurasian sparrowhawks (*Accipiter nisus*) brought to a wildlife rehabilitation center in England. *J. Raptor Res.* **2006**, *40*, 231–235; DOI:10.3356/0892-1016(2006)40[231:adaofe]2.0.co;2.
10. Margalida, A.; Heredia, R.; Razin, M.; Hernández, M. Sources of variation in mortality of the bearded vulture *Gypaetus barbatus* in Europe. *Bird Conserv. Int.* **2008**, *18*, 1–10; DOI:10.1017/s0959270908000026.
11. Molina, R.A.; Darwich, L. Causes of admission of little owl (*Athene noctua*) at a wildlife rehabilitation centre in Catalonia (Spain) from 1995 to 2010. *Anim. Biodivers. Conserv.* **2011**, *34*, 401–405.
12. Mariacher, A.; Gherardi, R.; Mastrorilli, M.; Melini, D. Causes of admission and outcomes of long-eared owl (*Asio otus*) in wildlife rescue centres in Italy from 2010 to 2014. *Avian Biol. Res.* **2016**, *9*, 282–286; DOI:10.3184/175815516x14739467542487.
13. Harris, M.C.; Sleeman, J.M. Morbidity and mortality of bald eagles (*Haliaeetus leucocephalus*) and peregrine falcons (*Falco peregrinus*) admitted to the wildlife center of Virginia, 1993–2003. *J. Zoo Wildl. Med.* **2007**, *38*, 62–66; DOI:10.1638/05-099.1.
14. Molina-López, R.A.; Casal, J.; Darwich, L. Causes of morbidity in wild raptor populations admitted at a wildlife rehabilitation centre in Spain from 1995–2007: A long term retrospective study. *PLoS One* **2011**, *6*, e24603; DOI:10.1371/journal.pone.0024603.
15. Molina-López, R.A.; Mañosa, S.; Torres-Riera, A.; Pomarol, M.; Darwich, L. Morbidity, outcomes and cost-benefit analysis of wildlife rehabilitation in Catalonia (Spain). *PLoS One* **2017**, *12*, e0181331; DOI:10.1371/journal.pone.0181331.
16. Rozsypalová, L.; Ryměšová, D.; Stýblo, P.; Literák, I. Causes of admission and outcomes of white-tailed eagles *Haliaeetus albicilla* in wildlife rescue centres in the Czech Republic during 2010–2020. *Avian Biol. Res.* **2022**, DOI:10.1177/17581559221107083.
17. Mazaris, A. D.; Mamakis, Y.; Kalpakis, S.; Pouloupoulos, Y.; Matsinos, Y. G. Evaluating potential threats to birds in Greece: An analysis of a 10-year data set from a rehabilitation centre. *Oryx*, **2008**, *42*, 408–414. DOI:10.1017/S003060530700066X
18. Panter, C.T.; Allen, S.; Backhouse, N.; Mullineaux, E.; Rose, C.-A.; Amar, A. Causes, temporal trends, and the effects of urbanization on admissions of wild raptors to rehabilitation centers in England and Wales. *Ecol. Evol.* **2022**, *12*:e8856. DOI:10.1002/ece3.8856.
19. Montesdeoca, N.; Calabuig, P.; Corbera, J.A.; Orós, J. A long-term retrospective study on rehabilitation of seabirds in Gran Canaria Island, Spain (2003–2013). *PLoS One* **2017**, *12*, e0177366; DOI:10.1371/journal.pone.0177366.
20. Petty, S.J.; Thirgood, S.J. A radio tracking study of post-fledging mortality and movements of Tawny Owls in Argyll. *Ringed Migr.* **1989**, *10*, 75–82; DOI:10.1080/03078698.1989.9673943.
21. Griffiths, R.; Murn, C.; Clubb, R. Survivorship of rehabilitated juvenile Tawny Owls (*Strix aluco*) released without support food, a radio tracking study. *Avian Biol. Res.* **2010**, *3*, 1–6; DOI:10.3184/175815510x12628917082461.
22. Sós-Koroknai, V.; Gál, J.; Marosán, M.; Tóth, T. Causes of morbidity of common buzzards (*Buteo buteo*) and long-eared owls (*Asio otus*) at a Hungarian wildlife rescue centre between 2014 and 2016. *Biharean Biol.* **2020** Jun 1;14(1):25-9.
23. Pavez, E.F.; Estades, C.F. Causes of admission to a rehabilitation center for andean condors (*Vultur gryphus*) in Chile. *J. Raptor Res.* **2016**, *50*, 23–32; DOI:10.3356/rapt-50-01-23-32.1.
24. Montesdeoca, N.; Calabuig, P.; Corbera, J.A.; Orós, J. Causes of admission for raptors to the Tafira wildlife rehabilitation center, Gran Canaria Island, Spain: 2003–13. *J. Wildl. Dis.* **2016**, *52*, 647; DOI:10.7589/2015-09-255.
25. Coon, N.C.; Locke, L.N.; Cromartie, E.; Reichel, W.L. Causes of bald eagle mortality, 1960–1965. *J. Wildl. Dis.* **1970**, *6*, 72–76; DOI:10.7589/0090-3558-6.1.72.

26. Fix, A.S.; Barrows, S.Z. Raptors rehabilitated in Iowa during 1986 and 1987: A retrospective study. *J. Wildl. Dis.* **1990**, *26*, 18–21; DOI:10.7589/0090-3558-26.1.18.
27. Deem, S.L.; Terrell, S.P.; Forrester, D.J. A retrospective study of morbidity and mortality of raptors in Florida: 1988–1994. *J. Zoo Wildl. Med.* **1998**, *29*, 160–164.
28. Stewart, P.A. Movements, population fluctuations, and mortality among great horned owls. *Wilson Bull.* **1969**, *81*, 155–162.
29. Keymer, I.F.; Fletcher, M.R.; Stanley, P.I. Causes of mortality in British kestrels (*Falco tinnunculus*). In *Recent Advances in the Study of Raptor Diseases*; Chiron, **1980**; pp. 143–151.
30. Erickson, W.P.; Johnson, G.D.; Young, D.P.J. A summary and comparison of bird mortality from anthropogenic causes with an emphasis on collisions. Ralph C John Rich Terrell Ed 2005 Bird Conserv Implement Integr Am Proc Third Int Partn Flight Conf 2002 March 20–24 Asilomar Calif Vol 2 Gen Tech Rep PSW-GTR-191 Albany CA US Dept Agric For Serv Pac Southwest Res Stn P 1029–1042. 2005;191. Available online: <https://www.fs.usda.gov/treearch/pubs/32103> (accessed on 30 November 2020).
31. Erritzøe, J. Causes of mortality in the long-eared owl *Asio otus*. *Dan. Ornitol. Foren. Tidskr.* **1999**, *93*, 162–164.
32. Erritzøe, J.; Mazgajski, T.D.; Rejt, L. Bird casualties on European roads — A review. *Acta Ornithol.* **2003**, *38*, 77–93; DOI:10.3161/068.038.0204.
33. Massemin, S.; Zorn, T. Highway mortality of barn owls in north-eastern France. *J. Raptor Res.* **1998**, *32*, 229–232.
34. Gottdenker, N.L.; Walsh, T.; Jiménez-Uzcátegui, G.; Betancourt, F.; Cruz, M.; Soos, C.; Miller, R.E.; Parker, P.G. Causes of mortality of wild birds submitted to the Charles Darwin research station, Santa Cruz, Galápagos, Ecuador from 2002–2004. *J. Wildl. Dis.* **2008**, *44*, 1024–1031; DOI:10.7589/0090-3558-44.4.1024.
35. Molina-López, R.A.; Casal, J.; Darwich, L. Prognostic indicators associated with early mortality of wild raptors admitted to a wildlife rehabilitation centre in Spain. *Vet. Q.* **2015**, *35*, 9–15; DOI:10.1080/01652176.2014.985856.
36. Cianchetti-Benedetti M.; Manzia F.; Fraticelli F.; J. G. Cecere. Shooting is still a main threat for raptors inhabiting urban and suburban areas of Rome, Italy, *Ital. J. Zool.* **2016**, *83*:3, 434–442, DOI: 10.1080/11250003.2016.1189611.
37. Mohammad Y.; Al Zoubi,; Nashat A.; Hamidan, Mohammad A.; Abu Baker,; Zuhair Amr. Causes of Raptor Admissions to Rehabilitation in Jordan. *J Raptor Res* **2020**; 54 (3): 273–278. DOI: 10.3356/0892-1016-54.3.273
38. Mashele N.M.; Thompson L.J.; Downs C.T. Trends in the admission of raptors to the Moholoholo Wildlife Rehabilitation Centre, Limpopo province, South Africa, *Afr Zool.* **2022**, *57*:1, 56–63, DOI: 10.1080/15627020.2021.2016073
39. Desmarchelier, M.; Santamaria-Bouvier, A.; Fitzgérald, G.; Lair, S. Mortality and morbidity associated with gunshot in raptorial birds from the province of Quebec: 1986 to 2007. *Can. Vet. J.* **2010**, *51*, 70–74.
40. Hager, S.B. Human-related threats to urban raptors. *J. Raptor Res.* **2009**, *43*, 210–226; DOI:10.3356/jrr-08-63.1.
41. Maphalala, M.I.; Monadjem, A.; Bildstein, K.L.; Hoffman, B.; Downs, C. Causes of admission to a raptor rehabilitation centre and factors that can be used to predict the likelihood of release. *Afr J Ecol.* **2021**, *59*: 510–517. DOI:10.1111/aje.12851.
42. Molony, S.E.; Baker, P.J.; Garland, L.; Cuthill, I.C.; Harris, S. Factors that can be used to predict release rates for wildlife casualties. *Anim. Welfare* **2007**, *16*, 361–367.
43. Lukesova, G.; Voslarova, E.; Vecerek, V.; Vucinic M. Causes of admission, length of stay and outcomes for common kestrels in rehabilitation centres in the Czech Republic. *Sci Rep* **2021**, *11*, 17269. DOI:10.1038/s41598-021-96688-8.
44. Kelly A.; Bland M. Admissions, diagnoses, and outcomes for Eurasian Sparrowhawks (*Accipiter nisus*) brought to a wildlife rehabilitation center in England. *J Raptor Res.* **2006**;40(3):231–5. DOI: 10.3356/0892-1016(2006)40[231:Adaofe]2.0.Co;2
45. Molina-López R.A.; Casal J.; Darwich L. Final disposition and quality auditing of the rehabilitation process in wild raptors admitted to a wildlife rehabilitation centre in Catalonia, Spain, during a twelve year period (1995–2007). *PLoS ONE.* **2013**;8(4):e60242. DOI: 10.1371/journal.pone.0060242.
46. Cope H.R.; McArthur C.; Dickman C.R.; Newsome T.M.; Gray R.; Herbert C.A. A systematic review of factors affecting wildlife survival during rehabilitation and release. *PLoS One.* **2022** Mar 17;17(3):e0265514. DOI: 10.1371/journal.pone.0265514.

Table S1: Multivariable multinomial logistic regression model evaluating risk factors for the different causes of admission in free-ranging birds of prey admitted at the Wildlife Rehabilitation Center of Pescara (Abruzzo, Italy) from 2005 to 2016 (the causes of admission infectious disease, intoxication, captivity by citizens and dead-on-arrival were reunited under the label “other causes of admission” considering the few number of admissions for each separated cause during the study period). Highlighted lines correspond to significant results.

Table S2: Multivariable logistic regression model evaluating factors influencing the outcome of birds of prey admitted to the Wildlife Rehabilitation Center of Pescara (Abruzzo, Italy) from 2005 to 2016. Highlighted lines correspond to significant results.

**Table S1.**

TABLE 3.1

| Admission cause |               | Total N° of admitted | N° of admitted | % N of admitted | Odds ratio | Confidence interval 95 % |         | P-Value |
|-----------------|---------------|----------------------|----------------|-----------------|------------|--------------------------|---------|---------|
|                 |               |                      |                |                 |            | Lower                    | Upper   |         |
| Nestling        | Family        |                      |                |                 |            |                          |         |         |
|                 | Strigidae     | 1053                 | 458            | 43.5            | 0.909      | 0.487                    | 1.695   | 0.764   |
|                 | Tytonidae     | 138                  | 20             | 14.5            | 0.535      | 0.184                    | 1.554   | 0.250   |
|                 | Accipitridae  | 731                  | 21             | 2.9             | 0.427      | 0.187                    | 0.974   | 0.043   |
|                 | Falconidae    | 509                  | 53             | 10.4            | Referent   |                          |         |         |
|                 | Year          |                      |                |                 |            |                          |         |         |
|                 | 2005          | 230                  | 51             | 22.2            | 2.373      | 0.764                    | 7.372   | 0.135   |
|                 | 2006          | 255                  | 68             | 26.7            | 2.236      | 0.742                    | 6.739   | 0.153   |
|                 | 2007          | 257                  | 60             | 23.3            | 2.924      | 0.943                    | 9.067   | 0.063   |
|                 | 2008          | 246                  | 50             | 20.3            | 3.837      | 1.169                    | 12.592  | 0.027   |
|                 | 2009          | 173                  | 34             | 19.7            | 2.869      | 0.812                    | 10.134  | 0.102   |
|                 | 2010          | 192                  | 46             | 24.0            | 6.148      | 1.829                    | 20.662  | 0.003   |
|                 | 2011          | 193                  | 46             | 23.8            | 6.926      | 1.845                    | 25.999  | 0.004   |
|                 | 2012          | 235                  | 66             | 28.1            | 7.376      | 2.114                    | 25.741  | 0.002   |
|                 | 2013          | 180                  | 31             | 17.2            | 1.737      | 0.517                    | 5.832   | 0.372   |
|                 | 2014          | 182                  | 48             | 26.4            | 17.056     | 3.902                    | 74.544  | <0.001  |
|                 | 2015          | 157                  | 35             | 22.3            | 5.440      | 1.469                    | 20.146  | 0.011   |
|                 | 2016          | 131                  | 17             | 13.0            | Referent   |                          |         |         |
|                 | Age (plumage) |                      |                |                 |            |                          |         |         |
|                 | Incomplete    | 592                  | 492            | 83.1            | 33.827     | 18.533                   | 61.745  | <0.001  |
|                 | Complete      | 1839                 | 60             | 3.3             | Referent   |                          |         |         |
|                 | Season        |                      |                |                 |            |                          |         |         |
|                 | Spring        | 365                  | 86             | 23.6            | 13.022     | 1.550                    | 109.438 | 0.018   |
|                 | Summer        | 1235                 | 465            | 37.7            | 17.855     | 2.216                    | 143.880 | 0.007   |
|                 | Fall          | 456                  | 0              | 0.0             | NC         | NC                       | NC      | NC      |
|                 | Winter        | 375                  | 1              | 0.3             | Referent   |                          |         |         |
|                 | Starvation    | Family               |                |                 |            |                          |         |         |
| Strigidae       |               | 1053                 | 54             | 5.1             | 0.451      | 0.249                    | 0.815   | 0.008   |
| Tytonidae       |               | 138                  | 14             | 10.1            | 0.898      | 0.363                    | 2.220   | 0.815   |
| Accipitridae    |               | 731                  | 105            | 14.4            | 1.543      | 0.856                    | 2.781   | 0.149   |
| Falconidae      |               | 509                  | 50             | 9.8             | Referent   |                          |         |         |
| Year            |               |                      |                |                 |            |                          |         |         |

|        |               |      |      |      |          |       |       |        |  |
|--------|---------------|------|------|------|----------|-------|-------|--------|--|
|        | 2005          | 230  | 11   | 4.8  | 0.132    | 0.044 | 0.393 | <0.001 |  |
|        | 2006          | 255  | 12   | 4.7  | 0.132    | 0.045 | 0.385 | <0.001 |  |
|        | 2007          | 257  | 15   | 5.8  | 0.173    | 0.060 | 0.498 | 0.001  |  |
|        | 2008          | 246  | 27   | 11.0 | 0.661    | 0.229 | 1.907 | 0.444  |  |
|        | 2009          | 173  | 10   | 5.8  | 0.333    | 0.099 | 1.113 | 0.074  |  |
|        | 2010          | 192  | 17   | 8.9  | 0.289    | 0.098 | 0.853 | 0.025  |  |
|        | 2011          | 193  | 21   | 10.9 | 0.921    | 0.278 | 3.044 | 0.892  |  |
|        | 2012          | 235  | 26   | 11.1 | 0.844    | 0.274 | 2.600 | 0.768  |  |
|        | 2013          | 180  | 21   | 11.7 | 0.485    | 0.164 | 1.429 | 0.189  |  |
|        | 2014          | 182  | 20   | 11.0 | 1.598    | 0.409 | 6.246 | 0.500  |  |
|        | 2015          | 157  | 19   | 12.1 | 0.661    | 0.208 | 2.097 | 0.482  |  |
|        | 2016          | 131  | 24   | 18.3 | Referent |       |       |        |  |
|        |               |      |      |      |          |       |       |        |  |
|        | Age (plumage) |      |      |      |          |       |       |        |  |
|        | Incomplete    | 592  | 16   | 2.7  | 0.673    | 0.315 | 1.439 | 0.307  |  |
|        | Complete      | 1839 | 207  | 11.3 | Referent |       |       |        |  |
|        |               |      |      |      |          |       |       |        |  |
|        | Season        |      |      |      |          |       |       |        |  |
|        | Spring        | 365  | 25   | 6.8  | 0.543    | 0.248 | 1.188 | 0.127  |  |
|        | Summer        | 1235 | 103  | 8.3  | 0.902    | 0.478 | 1.701 | 0.750  |  |
|        | Fall          | 456  | 42   | 9.2  | 0.398    | 0.205 | 0.775 | 0.007  |  |
|        | Winter        | 375  | 53   | 14.1 | Referent |       |       |        |  |
|        |               |      |      |      |          |       |       |        |  |
| Trauma | Family        |      |      |      |          |       |       |        |  |
|        | Strigidae     | 1053 | 467  | 44.3 | 0.565    | 0.359 | 0.889 | 0.014  |  |
|        | Tytonidae     | 138  | 91   | 65.9 | 0.710    | 0.352 | 1.429 | 0.337  |  |
|        | Accipitridae  | 731  | 560  | 76.6 | 1.046    | 0.642 | 1.703 | 0.857  |  |
|        | Falconidae    | 509  | 374  | 73.5 | Referent |       |       |        |  |
|        |               |      |      |      |          |       |       |        |  |
|        | Year          |      |      |      |          |       |       |        |  |
|        | 2005          | 230  | 144  | 62.6 | 0.494    | 0.208 | 1.175 | 0.111  |  |
|        | 2006          | 255  | 147  | 57.6 | 0.457    | 0.195 | 1.071 | 0.072  |  |
|        | 2007          | 257  | 159  | 61.9 | 0.555    | 0.233 | 1.324 | 0.184  |  |
|        | 2008          | 246  | 156  | 63.4 | 1.057    | 0.414 | 2.700 | 0.908  |  |
|        | 2009          | 173  | 119  | 68.8 | 1.074    | 0.400 | 2.888 | 0.887  |  |
|        | 2010          | 192  | 113  | 58.9 | 0.553    | 0.221 | 1.388 | 0.207  |  |
|        | 2011          | 193  | 119  | 61.7 | 1.486    | 0.509 | 4.338 | 0.469  |  |
|        | 2012          | 235  | 134  | 57.0 | 1.247    | 0.455 | 3.421 | 0.668  |  |
|        | 2013          | 180  | 115  | 63.9 | 0.759    | 0.295 | 1.951 | 0.567  |  |
|        | 2014          | 182  | 110  | 60.4 | 2.403    | 0.687 | 8.404 | 0.170  |  |
|        | 2015          | 157  | 94   | 59.9 | 0.864    | 0.312 | 2.396 | 0.779  |  |
|        | 2016          | 131  | 82   | 62.6 | Referent |       |       |        |  |
|        |               |      |      |      |          |       |       |        |  |
|        | Age (plumage) |      |      |      |          |       |       |        |  |
|        | Incomplete    | 592  | 81   | 13.7 | 0.475    | 0.271 | 0.832 | 0.009  |  |
|        | Complete      | 1839 | 1411 | 76.7 | Referent |       |       |        |  |
|        |               |      |      |      |          |       |       |        |  |
|        | Season        |      |      |      |          |       |       |        |  |

|              |               |      |     |      |          |       |       |       |
|--------------|---------------|------|-----|------|----------|-------|-------|-------|
|              | Spring        | 365  | 229 | 62.7 | 0.800    | 0.427 | 1.497 | 0.484 |
|              | Summer        | 1235 | 598 | 48.4 | 0.811    | 0.474 | 1.387 | 0.444 |
|              | Fall          | 456  | 366 | 80.3 | 0.570    | 0.332 | 0.977 | 0.041 |
|              | Winter        | 375  | 299 | 79.7 | Referent |       |       |       |
| Other causes | Family        |      |     |      | Referent |       |       |       |
|              | Strigidae     | 1053 | 74  | 7.0  |          |       |       |       |
|              | Tytonidae     | 138  | 13  | 9.4  |          |       |       |       |
|              | Accipitridae  | 731  | 45  | 6.2  |          |       |       |       |
|              | Falconidae    | 509  | 32  | 6.3  |          |       |       |       |
|              | Year          |      |     |      |          |       |       |       |
|              | 2005          | 230  | 24  | 10.4 |          |       |       |       |
|              | 2006          | 255  | 28  | 11.0 |          |       |       |       |
|              | 2007          | 257  | 23  | 8.9  |          |       |       |       |
|              | 2008          | 246  | 13  | 5.3  |          |       |       |       |
|              | 2009          | 173  | 10  | 5.8  |          |       |       |       |
|              | 2010          | 192  | 16  | 8.3  |          |       |       |       |
|              | 2011          | 193  | 7   | 3.6  |          |       |       |       |
|              | 2012          | 235  | 9   | 3.8  |          |       |       |       |
|              | 2013          | 180  | 13  | 7.2  |          |       |       |       |
|              | 2014          | 182  | 4   | 2.2  |          |       |       |       |
|              | 2015          | 157  | 9   | 5.7  |          |       |       |       |
|              | 2016          | 131  | 8   | 6.1  |          |       |       |       |
|              | Age (plumage) |      |     |      |          |       |       |       |
|              | Incomplete    | 592  | 21  | 3.5  |          |       |       |       |
|              | Complete      | 1839 | 143 | 7.8  |          |       |       |       |
|              | Season        |      |     |      |          |       |       |       |
|              | Spring        | 365  | 25  | 6.8  |          |       |       |       |
|              | Summer        | 1235 | 69  | 5.6  |          |       |       |       |
|              | Fall          | 456  | 48  | 10.5 |          |       |       |       |
|              | Winter        | 375  | 22  | 5.9  |          |       |       |       |

Table S2.

|              | Admitted | Released | Released rate (%) | Odds ratio         | Confidence interval 95% |       | P-value |
|--------------|----------|----------|-------------------|--------------------|-------------------------|-------|---------|
|              |          |          |                   |                    | Lower                   | Upper |         |
| FAMILY       |          |          |                   |                    |                         |       |         |
| Strigidae    | 1029     | 541      | 52.6              | Referent           |                         |       |         |
| Tytonidae    | 125      | 51       | 40.8              | 1.491              | 0.946                   | 2.348 | 0.085   |
| Accipitridae | 657      | 193      | 29.4              | 0.995              | 0.752                   | 1.317 | 0.973   |
| Falconidae   | 370      | 127      | 34.3              | 0.896              | 0.654                   | 1.228 | 0.495   |
|              |          |          |                   |                    |                         |       |         |
| GAP          |          |          |                   | 1.232              | 1.099                   | 1.381 | < 0.001 |
| 0            | 972      | 380      | 39.1              | Linear correlation |                         |       |         |
| 1            | 795      | 329      | 41.4              |                    |                         |       |         |
| 2 to 3       | 306      | 136      | 44.4              |                    |                         |       |         |
| 4 to 10      | 86       | 54       | 62.8              |                    |                         |       |         |
| > 10         | 22       | 13       | 59.1              |                    |                         |       |         |
|              |          |          |                   |                    |                         |       |         |
| SEASONS      |          |          |                   |                    |                         |       |         |
| Spring       | 315      | 149      | 47.3              | Referent           |                         |       |         |
| Summer       | 1128     | 538      | 47.7              | 0.741              | 0.545                   | 1.009 | 0.057   |
| Fall         | 396      | 135      | 34.1              | 1.005              | 0.705                   | 1.433 | 0.979   |
| Winter       | 342      | 90       | 26.3              | 0.652              | 0.445                   | 0.955 | 0.028   |
|              |          |          |                   |                    |                         |       |         |
| YEAR         |          |          |                   |                    |                         |       |         |
| 2005         | 202      | 81       | 40.1              | Referent           |                         |       |         |
| 2006         | 220      | 96       | 43.6              | 1.131              | 0.708                   | 1.804 | 0.607   |
| 2007         | 224      | 94       | 42                | 1.265              | 0.798                   | 2.004 | 0.318   |
| 2008         | 222      | 82       | 36.9              | 0.737              | 0.462                   | 1.175 | 0.200   |
| 2009         | 158      | 55       | 34.8              | 0.662              | 0.396                   | 1.108 | 0.117   |
| 2010         | 180      | 75       | 41.7              | 0.983              | 0.602                   | 1.604 | 0.945   |
| 2011         | 177      | 71       | 40.1              | 1.022              | 0.625                   | 1.672 | 0.930   |
| 2012         | 221      | 101      | 45.7              | 1.145              | 0.722                   | 1.814 | 0.566   |
| 2013         | 155      | 58       | 37.4              | 0.938              | 0.562                   | 1.567 | 0.808   |
| 2014         | 164      | 80       | 48.8              | 1.398              | 0.848                   | 2.305 | 0.189   |
| 2015         | 140      | 59       | 42.1              | 1.225              | 0.734                   | 2.044 | 0.437   |
| 2016         | 118      | 60       | 50.8              | 2.204              | 1.294                   | 3.755 | 0.004   |
|              |          |          |                   |                    |                         |       |         |
| AGE          |          |          |                   |                    |                         |       |         |
| Incomplete   | 603      | 418      | 69.3              | Referent           |                         |       |         |
| Complete     | 1578     | 494      | 31.3              | 1.148              | 0.776                   | 1.696 | 0.490   |
|              |          |          |                   |                    |                         |       |         |
| BCS          |          |          |                   | 1.849              | 1.605                   | 2.130 | < 0.001 |
| 1            | 223      | 28       | 12.6              | Linear correlation |                         |       |         |
| 2            | 907      | 329      | 36.3              |                    |                         |       |         |
| 3            | 833      | 429      | 51.5              |                    |                         |       |         |
| 4            | 218      | 126      | 57.8              |                    |                         |       |         |



| DIAGNOSIS               |     |     |      |          |       |       |         |
|-------------------------|-----|-----|------|----------|-------|-------|---------|
| Nestling                | 524 | 423 | 80.7 | Referent |       |       |         |
| Starvation              | 232 | 82  | 35.3 | 0.164    | 0.101 | 0.265 | < 0.001 |
| Head trauma             | 245 | 99  | 40.4 | 0.157    | 0.098 | 0.249 | < 0.001 |
| Multiple trauma         | 208 | 38  | 18.3 | 0.047    | 0.028 | 0.080 | < 0.001 |
| Wing fracture           | 649 | 160 | 24.7 | 0.079    | 0.051 | 0.123 | < 0.001 |
| Wing wound              | 36  | 10  | 27.8 | 0.085    | 0.036 | 0.201 | < 0.001 |
| Wing luxation           | 43  | 12  | 27.9 | 0.101    | 0.046 | 0.222 | < 0.001 |
| Leg trauma              | 70  | 25  | 35.7 | 0.130    | 0.071 | 0.239 | < 0.001 |
| Plumage trauma          | 59  | 37  | 62.7 | 0.388    | 0.200 | 0.752 | 0.005   |
| Infectious or parasitic | 31  | 18  | 58.1 | 0.267    | 0.116 | 0.616 | 0.002   |
| Trunk trauma            | 20  | 1   | 5    | 0.010    | 0.001 | 0.077 | < 0.001 |
| Toxic                   | 64  | 7   | 10.9 | 0.024    | 0.010 | 0.057 | < 0.001 |
